# Supplementary material
Source: Royal Society of Chemistry journal article supplement (doi:10.1039/d5ew01176k)
Supplement: d5ew01176k1.pdf [file d5ew01176k1.pdf]

## Supplementary Material

### Predictive models for the formation of emerging disinfection by products.

Kozari Argyri<sup>1</sup>, Voutsas Dimitra<sup>1</sup>

1: Environmental Pollution Control Laboratory, School of Chemistry, Aristotle University, 541 24 Thessaloniki, Greece

Corresponding authors: [akozaria@chem.auth.gr](mailto:akozaria@chem.auth.gr) (A. Kozari), [dvoutsas@chem.auth.gr](mailto:dvoutsas@chem.auth.gr) (D. Voutsas)

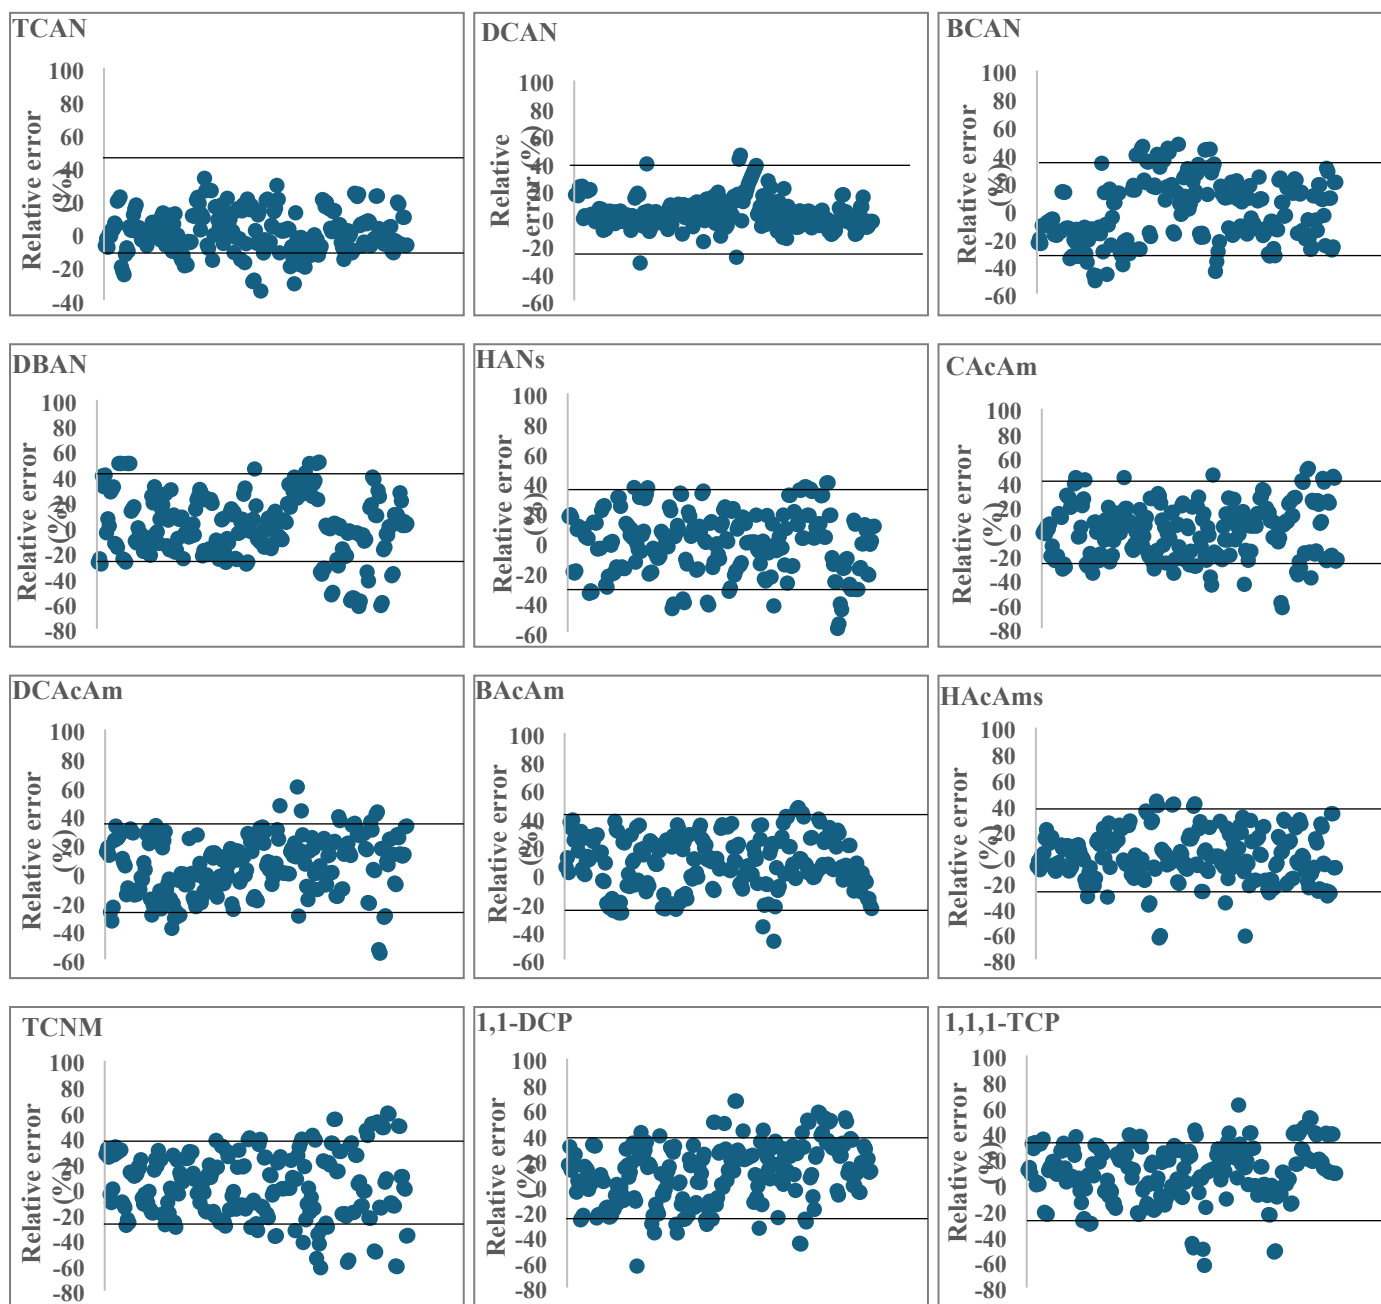

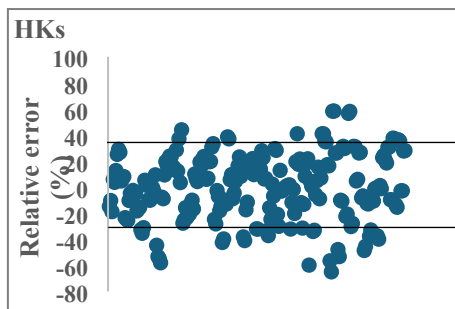

Fig. S1: Relative errors between measured and predicted from linear model concentrations of eDBPs. Solid lines refer to 30% accepted error.

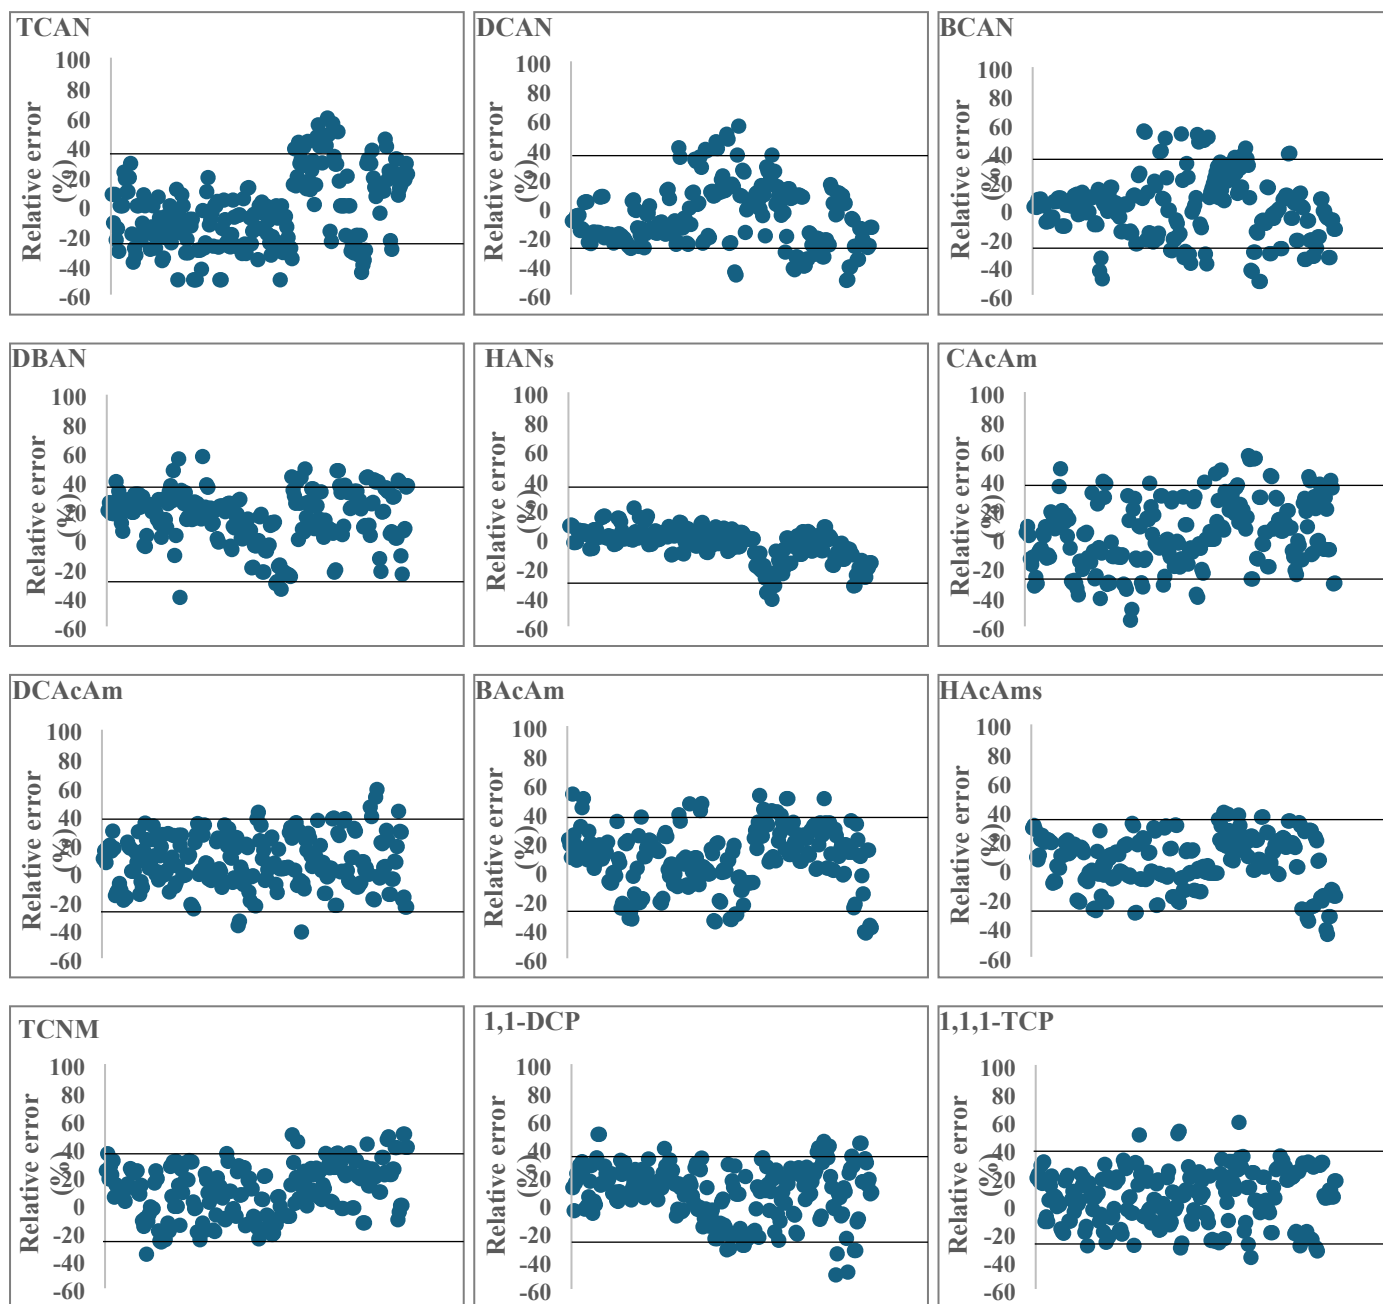

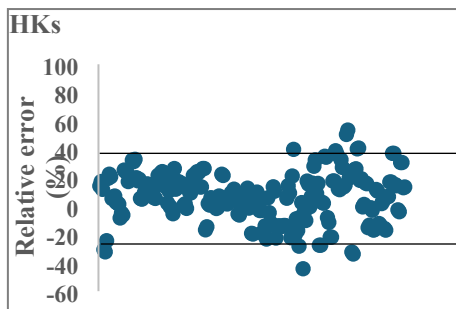

Fig. S2: Relative errors between measured and predicted from logarithmic linear model concentrations of eDBPs. Solid lines refer to 30% accepted error.
